# Supplementary material
Source: PubMed Central journal article supplement (PMC8726724)

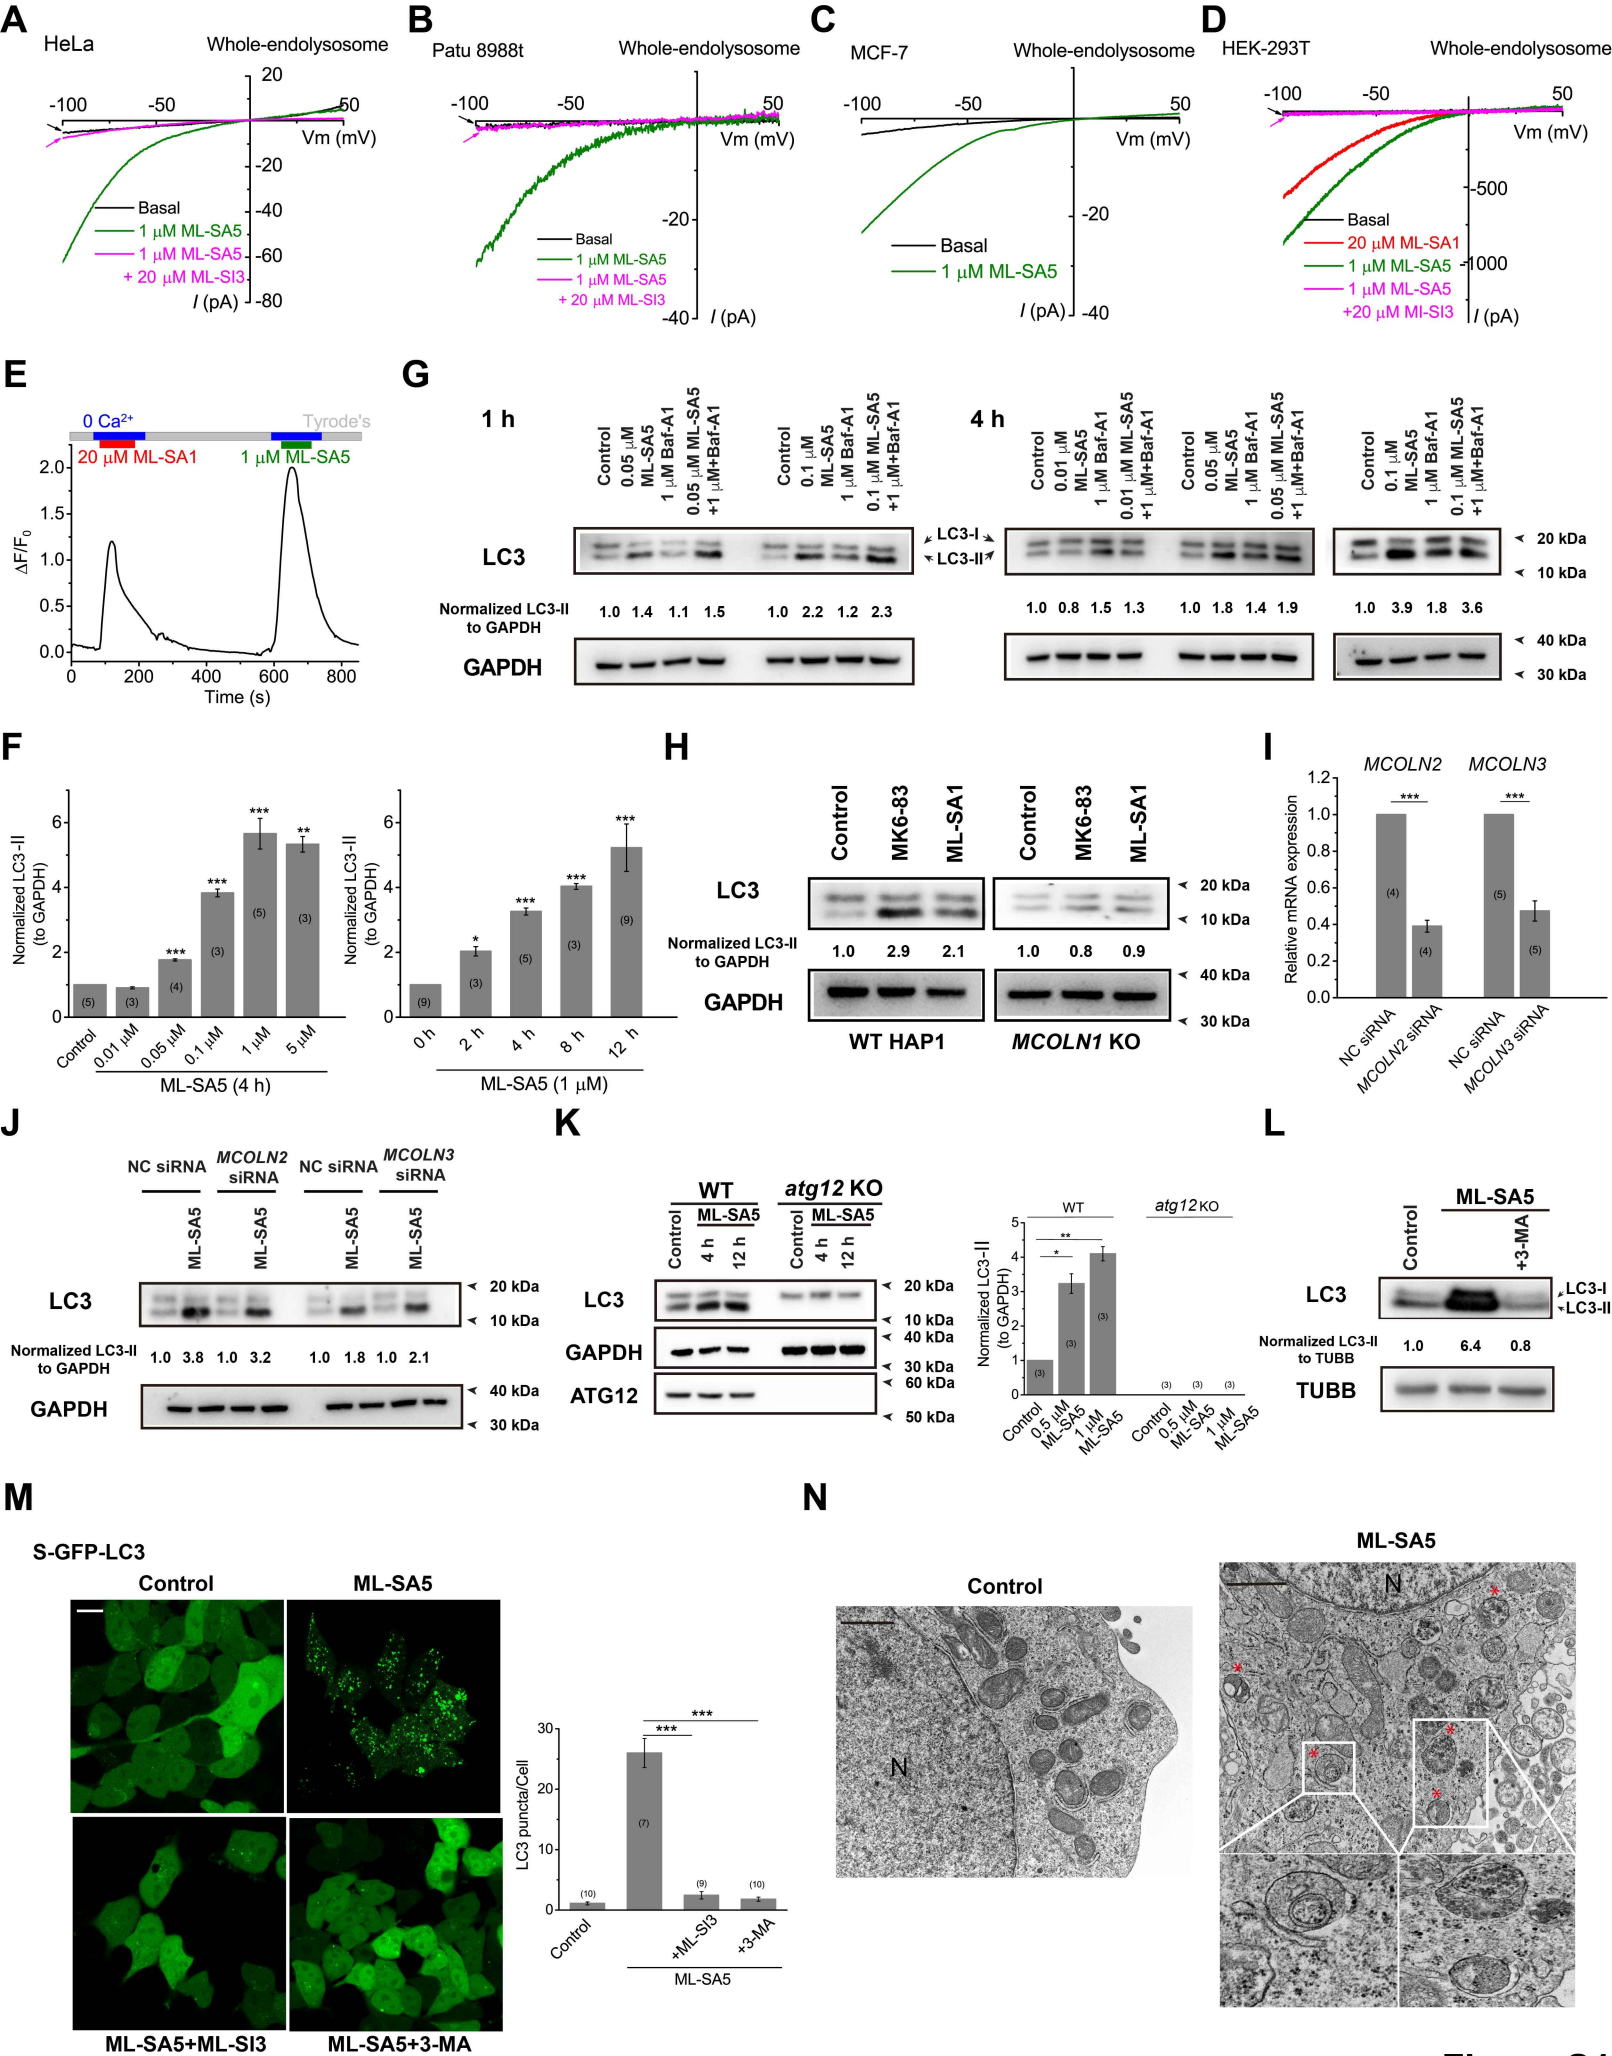

Figure S1

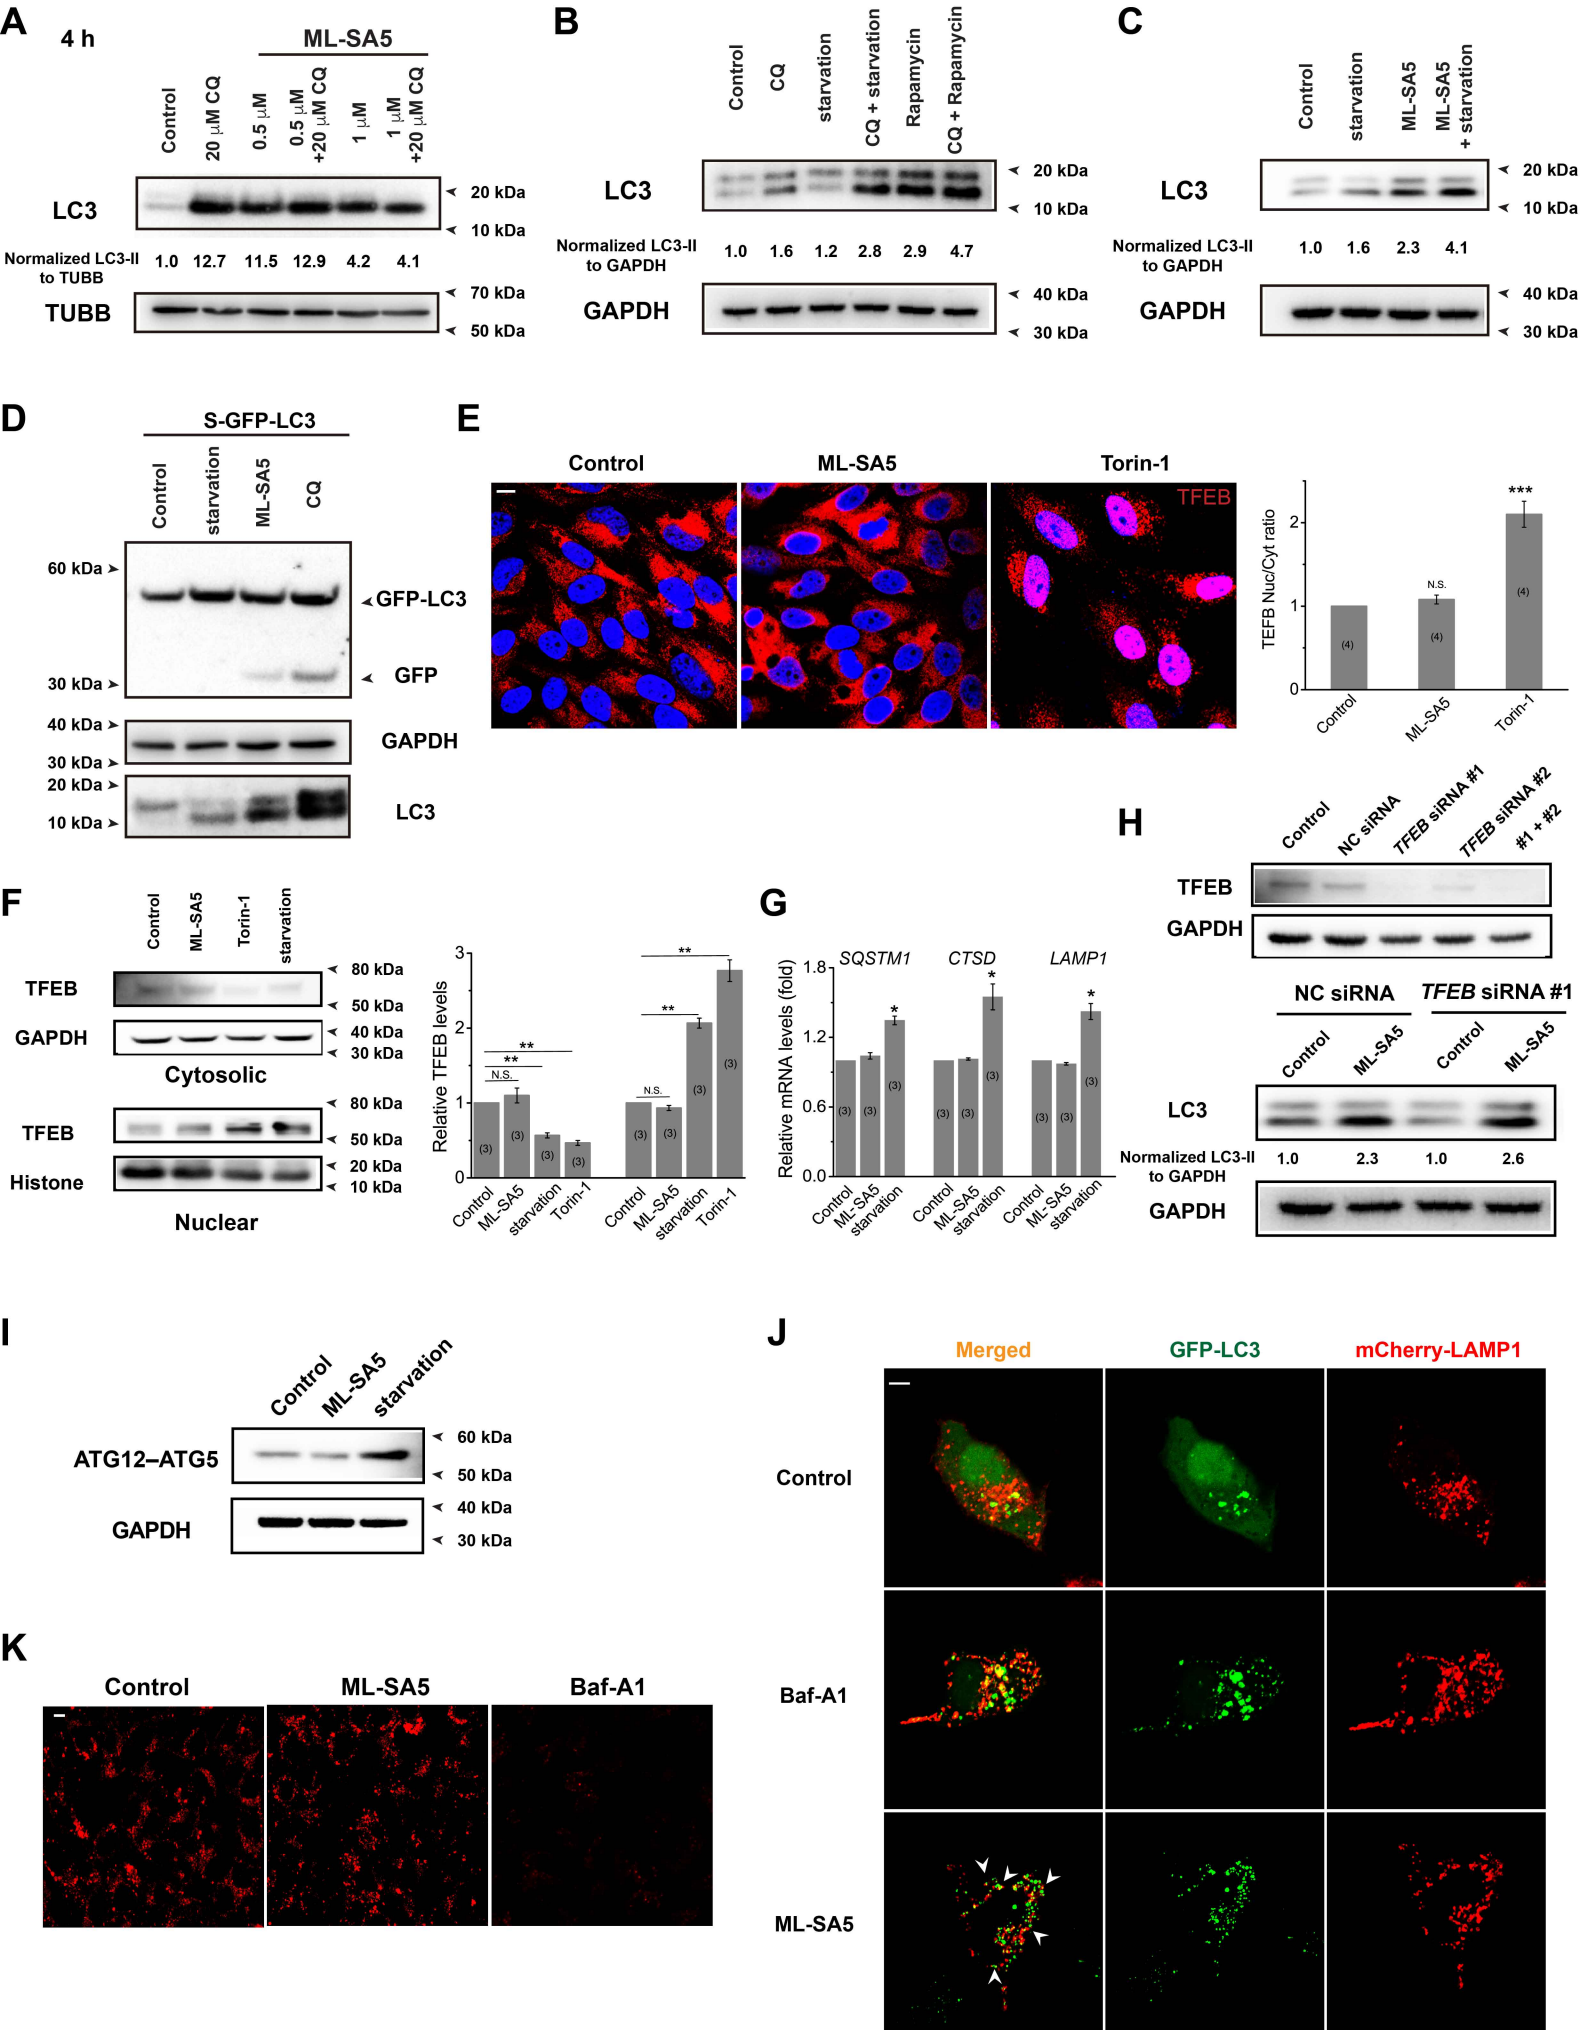

Figure S2

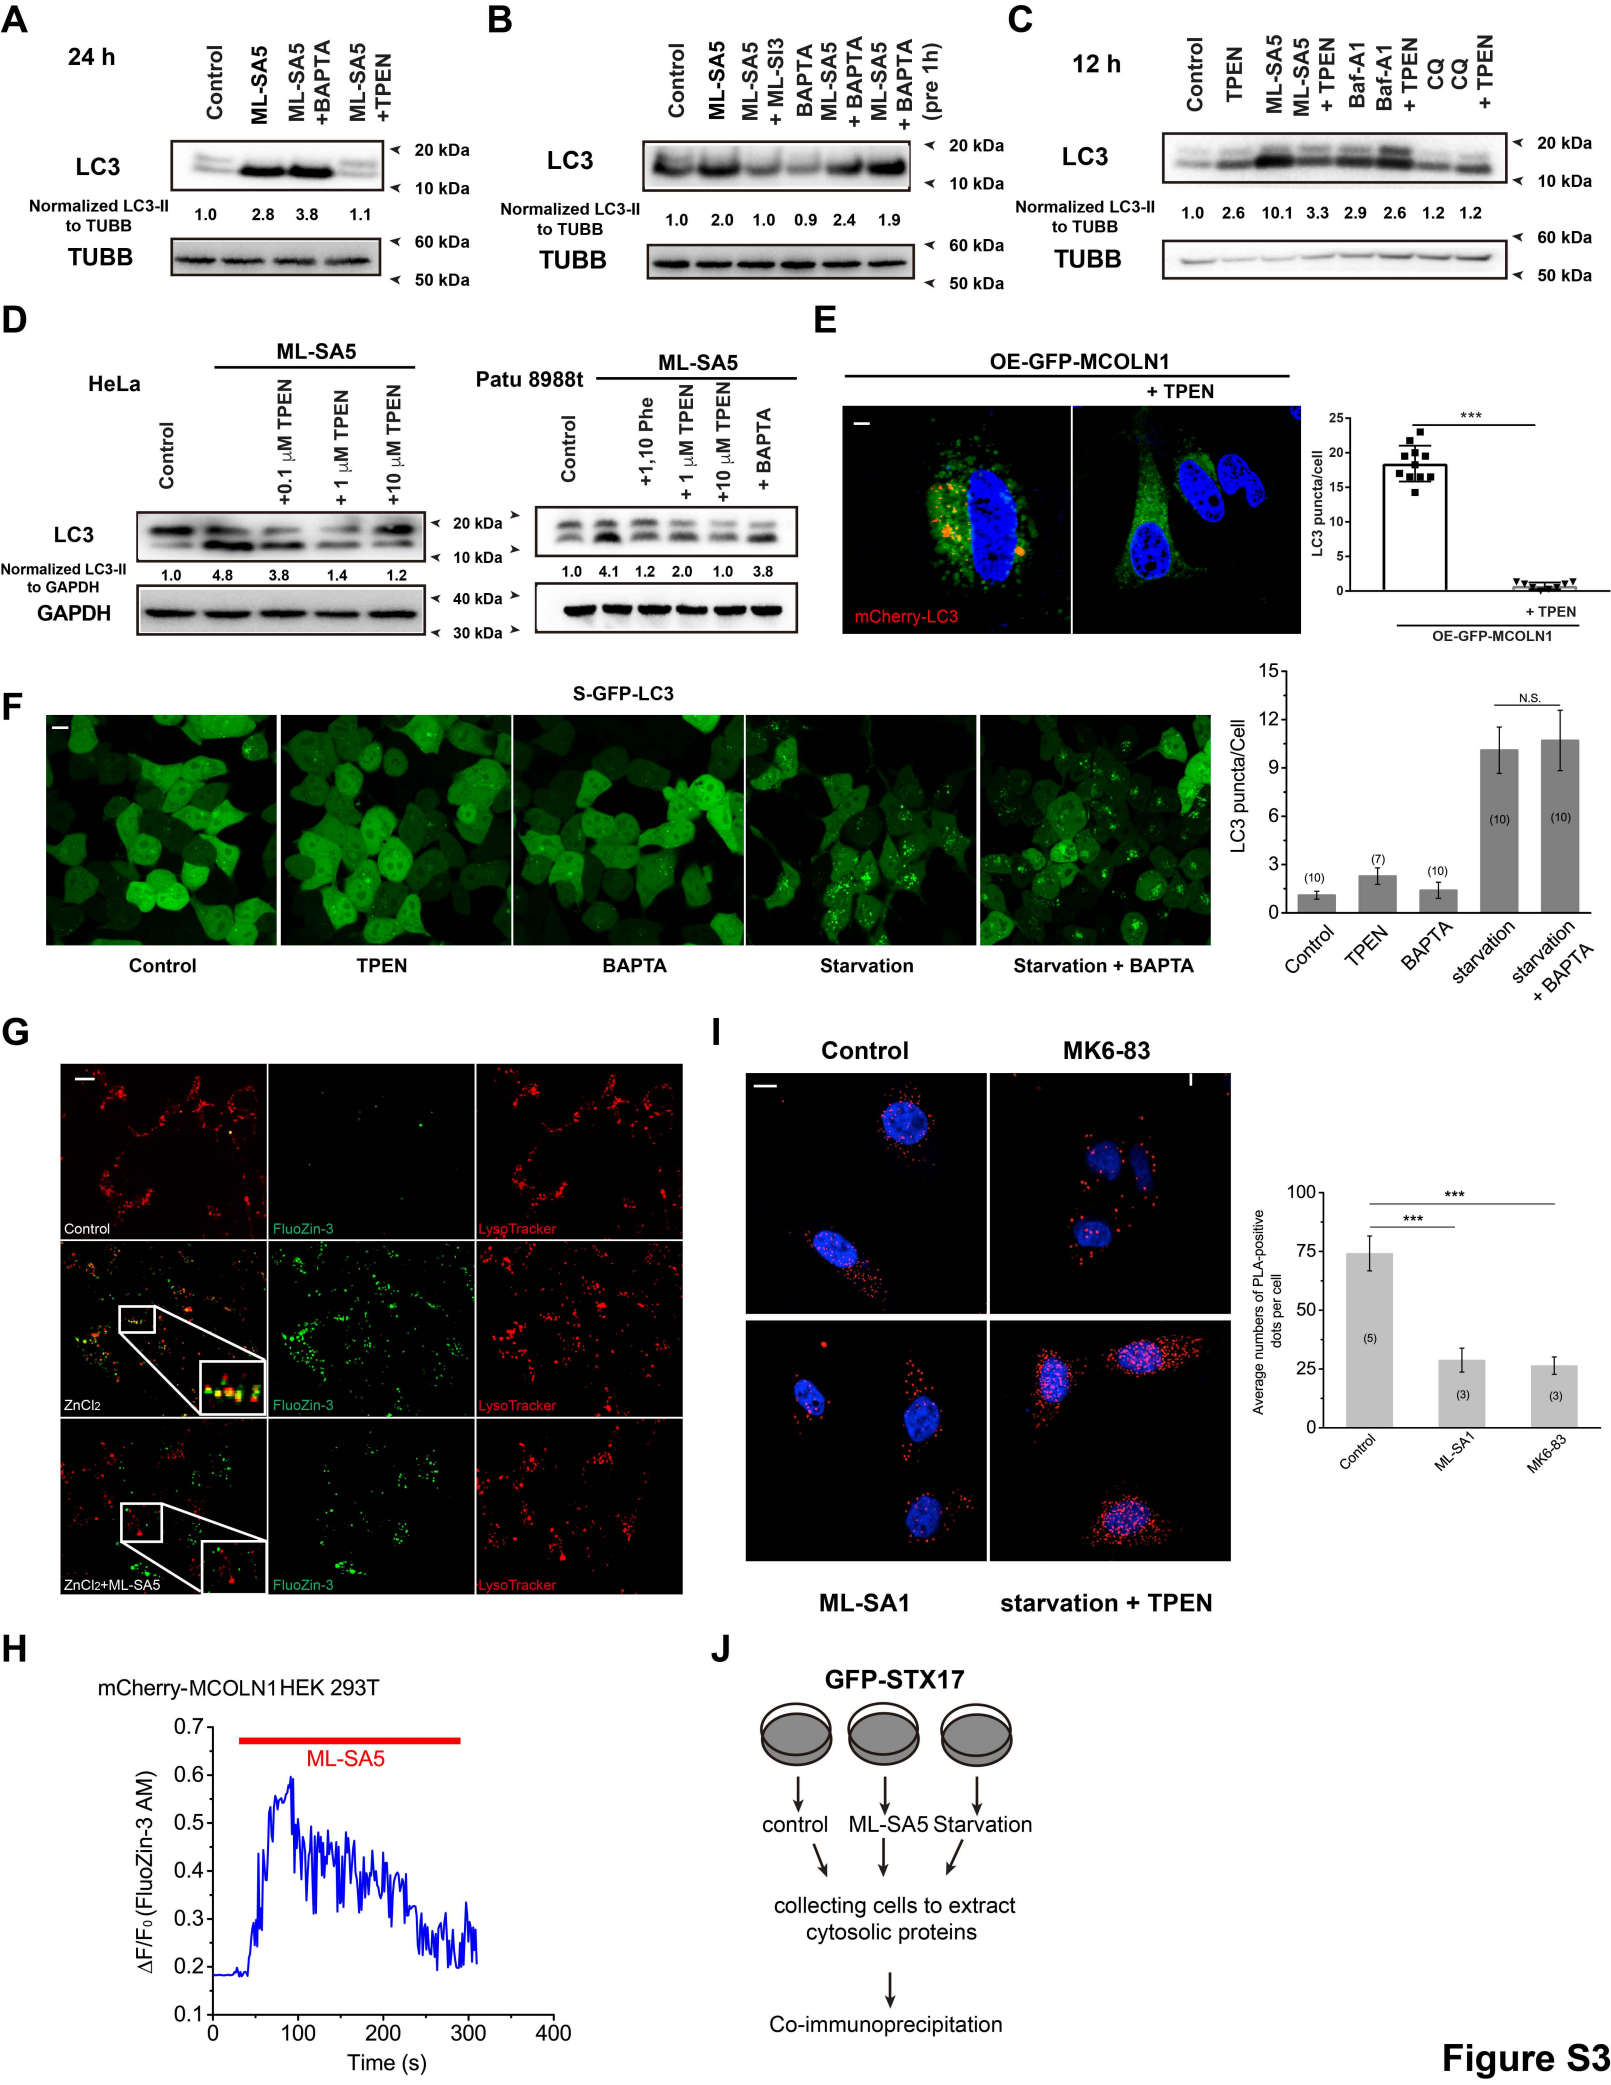

Figure S3

**A**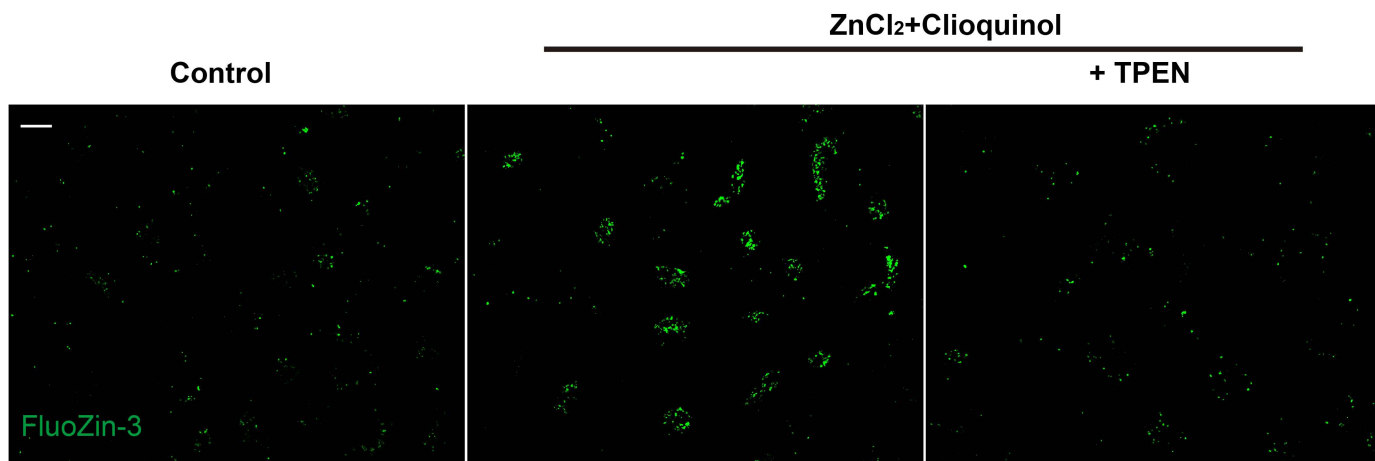**B**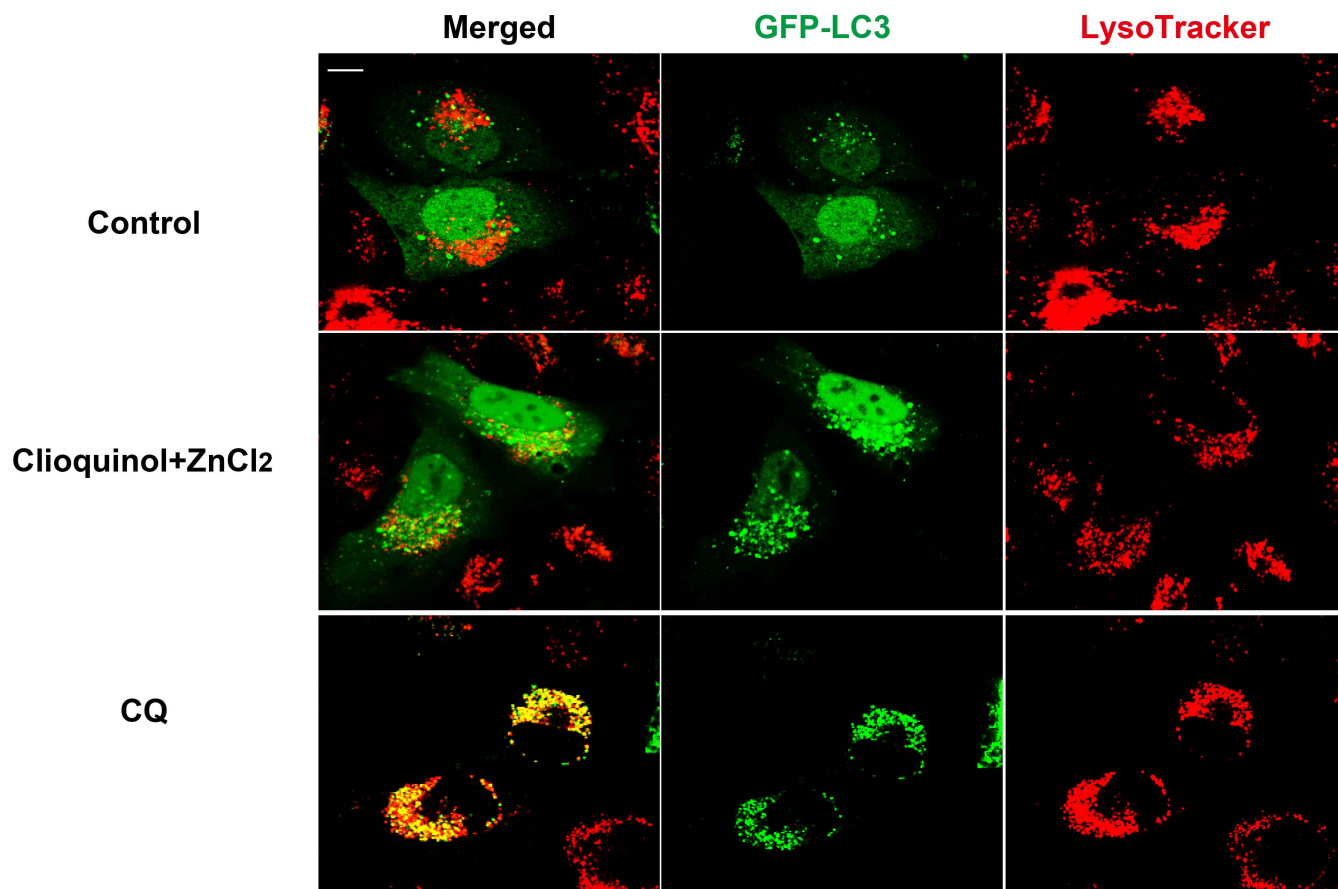**Figure S4**

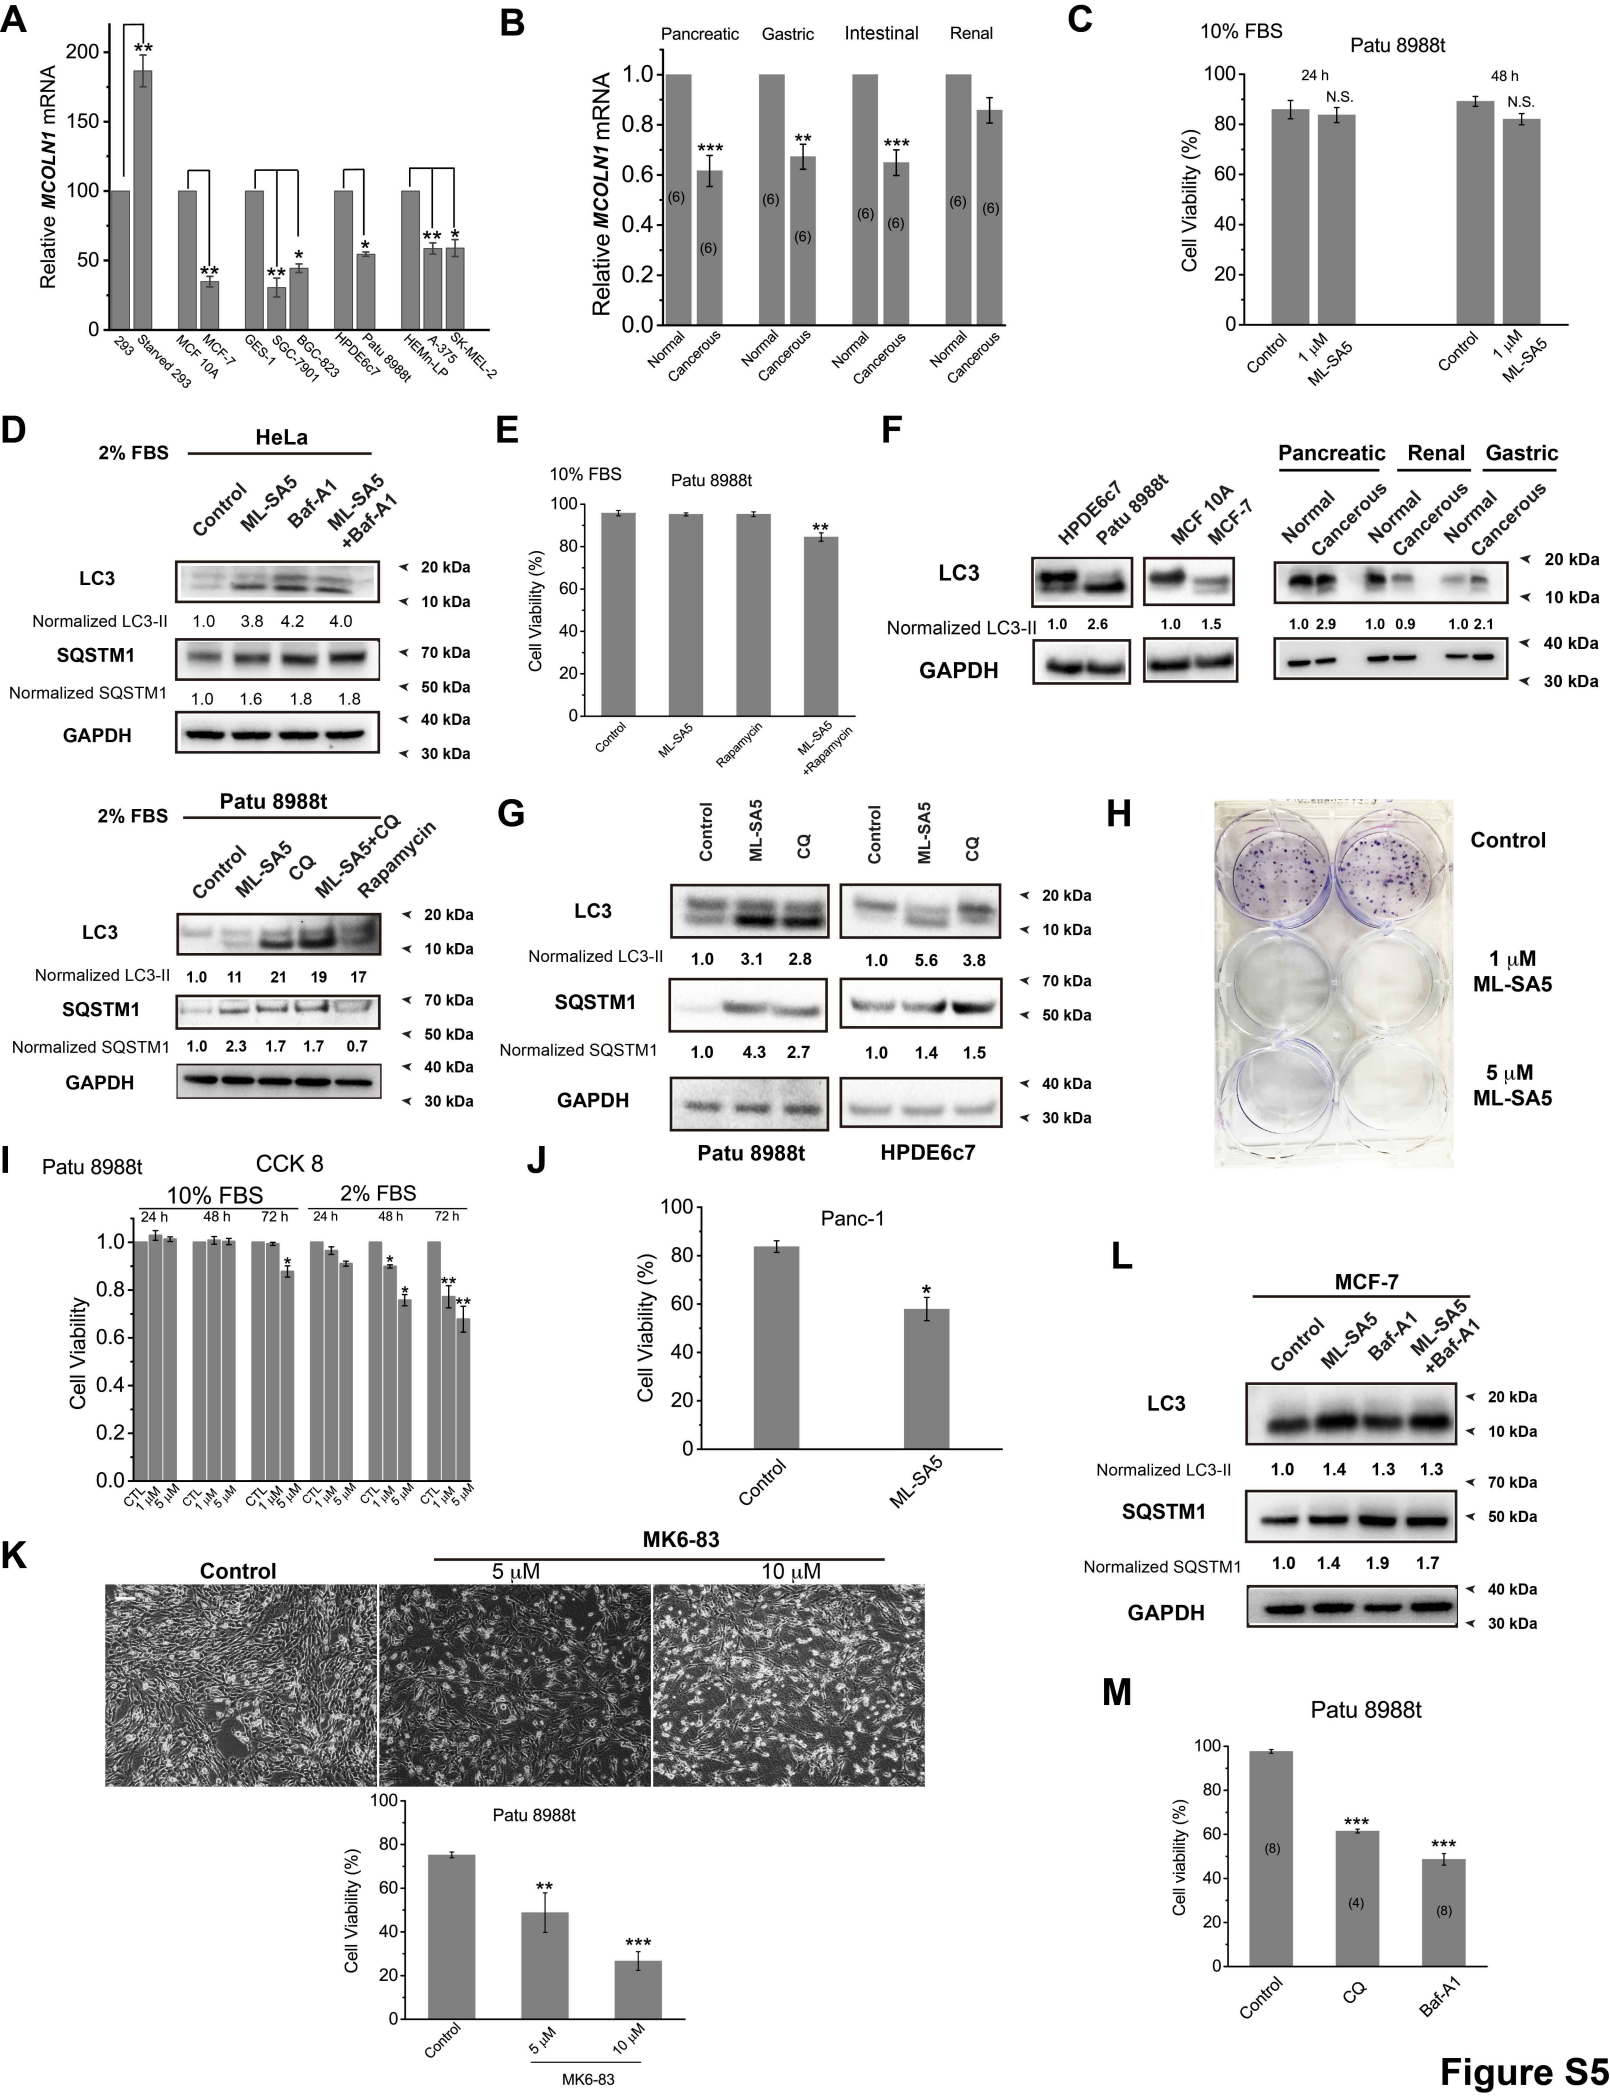

Figure S5

**A**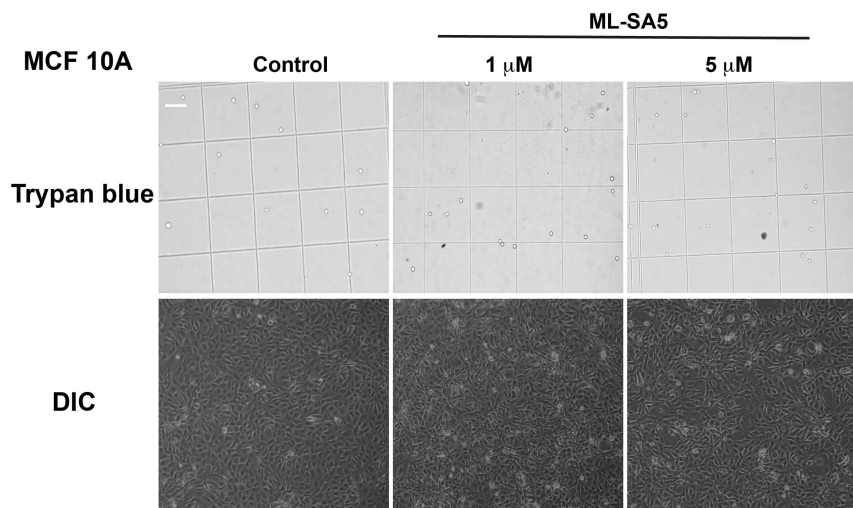**B**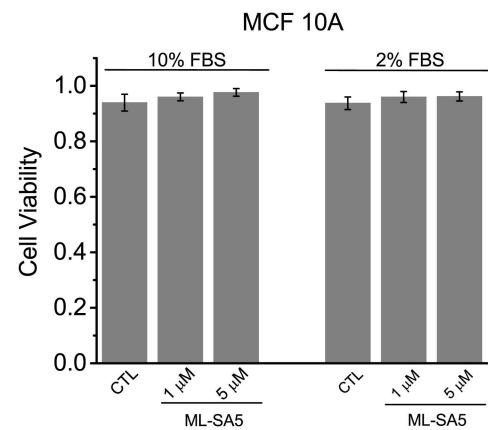**C**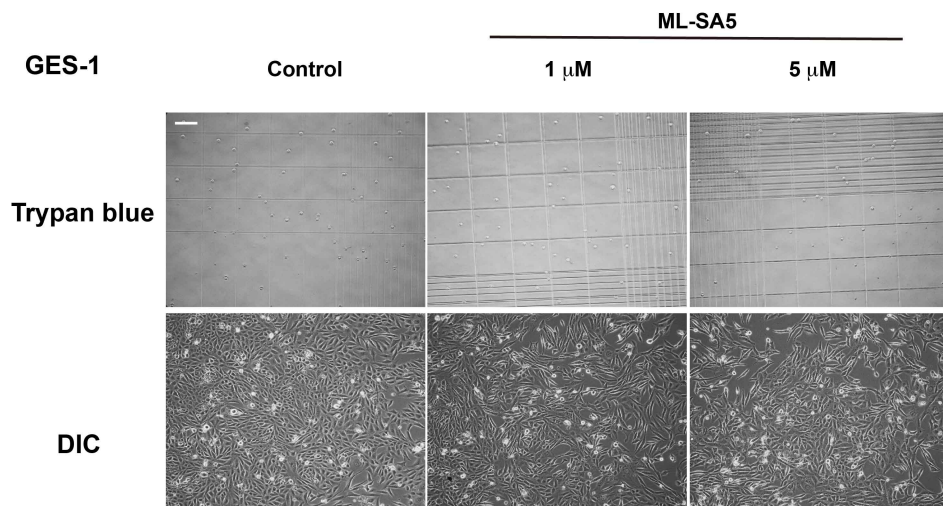**D**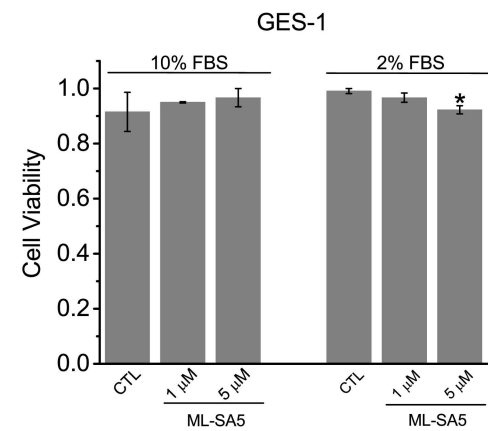**E**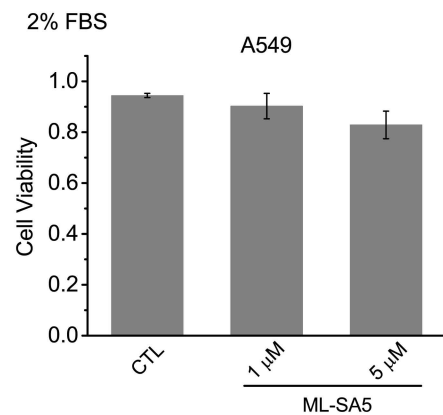**F**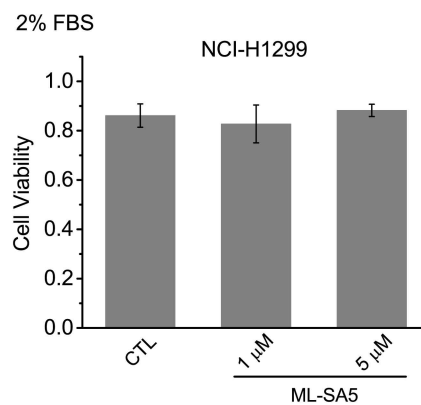

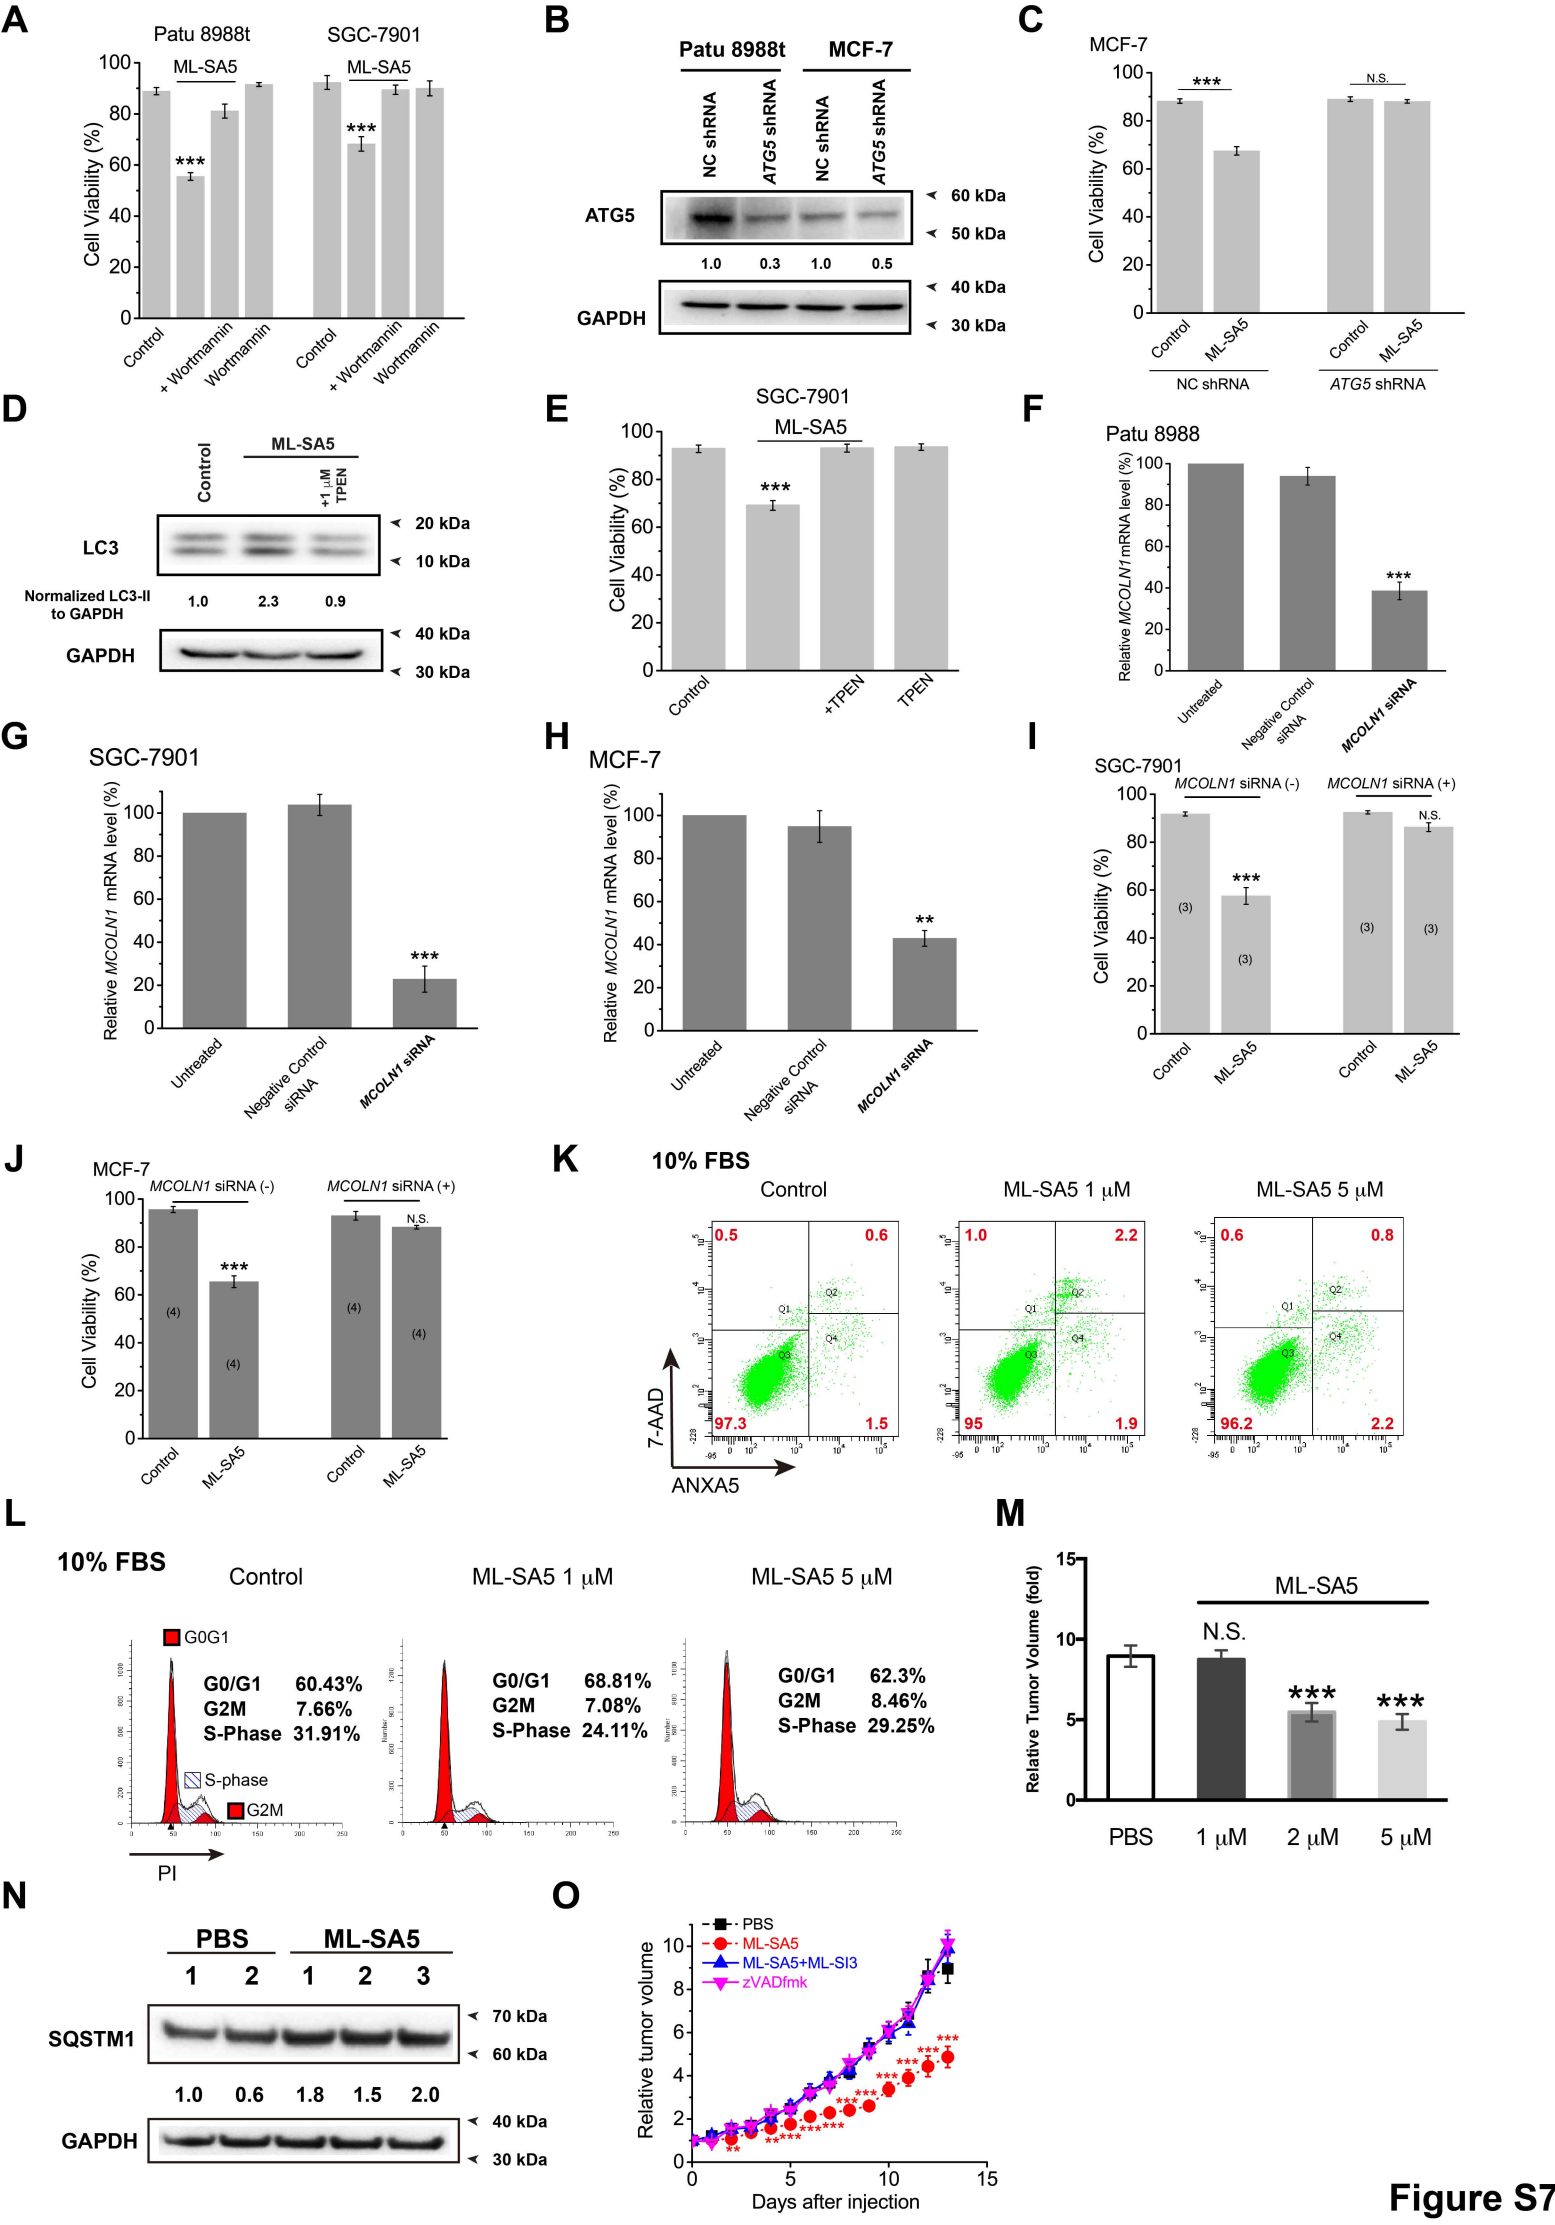

Supplement: KAUP_A_1917132_SM8700.pdf [file KAUP_A_1917132_SM8700.pdf]
